# Supplementary material
Source: publisher site journal article supplement (https://www.dovepress.com/article/301454)
Supplement: Supplementary file 1 [file get_supplementary_file.php]

**Table S1** Spearman correlation coefficient of the gut microbiota and the FBG at the species level

|  | FBG |
| --- | --- |
| Helicobacter hepaticus | -0.21 |
| Ruminococcus gnavus | 0.72 |
| Bacteroides uniformis | 0.11 |
| Akkermansia muciniphila | -0.29 |
| Bacteroides acidifaciens | -0.0839 |
| Parabacteroides distasonis | -0.0359 |
| Mucispirillum schaedleri | -0.25 |
